# Supplementary material for: L-RAPiT: A Cloud-Based Computing Pipeline for the Analysis of Long-Read RNA Sequencing Data
Source: MDPI journal article supplement (doi:10.3390/ijms232415851), 2022-12-13
Supplement: s1 [file s1]

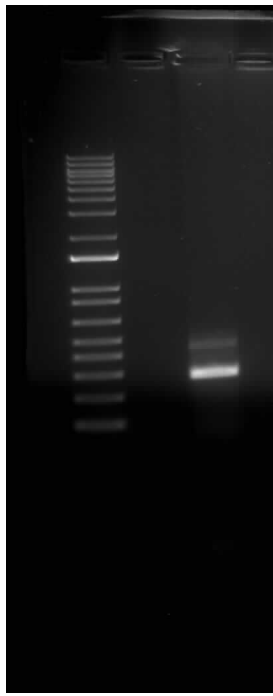

**Supplementary Figure S1. L-RAPiT identifies novel transcript variants at the *LINC00173* locus in the use-case sample.** Uncropped gel image of PCR-amplified transcripts TN\_280 and TN\_435. See Figure 3 for details.
