# Supplementary material for: L-RAPiT: A Cloud-Based Computing Pipeline for the Analysis of Long-Read RNA Sequencing Data
Source: MDPI journal article supplement (doi:10.3390/ijms232415851), 2022-12-13
Supplement: s1 [file s1]

## Coverage Map of Shark-Filtered, Aligned LRS Reads

[0 - 22041]

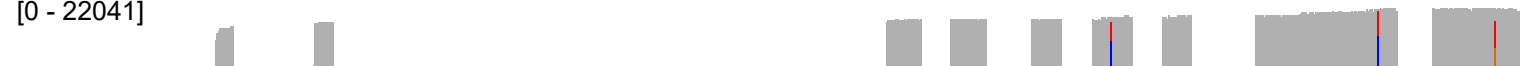

## StringTie Annotations

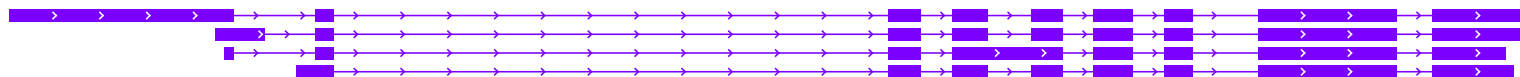

## Ensembl Reference Annotations for *GAPDH*

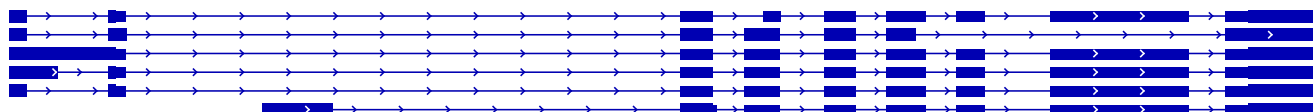

**Supplementary Figure S2. StringTie results for *GAPDH*, a highly expressed gene.** Separately from the use case analyzing *LINC00173*, L-RAPiT was run with the same parameters but targeting the gene *GAPDH* (chr12: 6,534,517-6,538,371), which is expressed at high levels in HEK 293T cells. From top to bottom: coverage map of the *GAPDH* locus showing reads filtered by Shark, aligned by minimap2 and compressed and indexed by SAMtools; StringTie-generated *de novo* annotation of the LRS alignment; and the reference transcripts currently annotated in Ensembl. Image generated with IGV.
